# Supplementary material
Source: PubMed Central journal article supplement (PMC5266673)
Supplement: NIHMS844291-supplement-Supplementary_Table_1.pdf [file NIHMS844291-supplement-Supplementary_Table_1.pdf]

**Supplementary Table 1.** Patient signalment, pathology findings, and laboratory data for Miniature Schnauzers with glomerular disease that underwent renal biopsy.

| Lipid Lesion            | Sex | Age, yrs | Full Diagnosis                                     | Additional Electron Microscopy Findings                                 | ICGN | UPC  | Albumin, g/dL | Creatinine, mg/dL | SBP, mmHg | Cholesterol, mg/dL | TG, mg/dL |
|-------------------------|-----|----------|----------------------------------------------------|-------------------------------------------------------------------------|------|------|---------------|-------------------|-----------|--------------------|-----------|
| Glomerular Lipid Emboli | FS  | 8.8      | glomerular lipid emboli and FSGS                   | lipid in capillary wall and mesangium                                   | NO   | 18.0 | 2.8           | 0.9               | NA        | NA                 | NA        |
|                         | FS  | 6.6      | glomerular lipid emboli and FSGS                   | lipid in cells and in capillary loops                                   | NO   | 11.4 | 2.7           | 0.6               | 128       | 390                | 520       |
|                         | FS  | 6.3      | glomerular lipid emboli and FSGS                   | lipid in mesangium, capillary walls and in capillary loops              | NO   | 9.3  | 2.8           | 0.8               | 130       | 559                | 380       |
|                         | MC  | 10.0     | glomerular lipid emboli and FSGS                   | lipid in cells and in capillary loops                                   | NO   | 6.0  | 3.2           | 0.8               | 133       | NA                 | 744       |
|                         | MI  | 12.8     | glomerular lipid emboli and synechiae              | lipid in mesangium, capillary walls and in capillary loops              | NO   | 4.6  | 3.3           | 0.6               | 146       | 731                | 2481      |
|                         | MC  | 8.1      | glomerular lipid emboli and FSGS                   | lipid emboli                                                            | NO   | 3.0  | 3             | NA                | 140       | 281                | 624       |
|                         | FS  | 12.4     | arterionephrosclerosis and glomerular lipid emboli | lipid in mesangium, capillary walls and in capillary loops              | NO   | 1.8  | 3.6           | 2.9               | 145       | 278                | 461       |
| Glomerular Lipidosis    | MC  | 1.7      | glomerular lipidosis and fetal glomeruli           | lipid in mesangium                                                      | NO   | 5.3  | 3.8           | 1.1               | 194       | NA                 | NA        |
| Other Lipid Deposits    | FS  | 6.0      | glomerulopathy                                     | lipid in capillary wall and mesangium                                   | NO   | 12.6 | 3.8           | 0.6               | 120       | 332                | NA        |
|                         | FS  | 12.5     | FSGS, GCA                                          | GBM opathy and lipid in mesangium                                       | NO   | 9.3  | 3.7           | 1                 | 155       | NA                 | NA        |
|                         | MI  | 0.3      | nephrosclerosis                                    | lipid in mesangium and dense deposits segmentally in the capillary wall | NO   | 8.5  | 1.9           | 2                 | 180       | NA                 | NA        |
|                         | FS  | 8.7      | FSGS, GCA                                          | lipid in capillary wall and mesangium                                   | NO   | 7.7  | 3.9           | 2.1               | 130       | NA                 | NA        |
|                         | FS  | 6.3      | FSGS                                               | scattered deposits in capillary walls and                               | YES  | 6.2  | 3.3           | 0.8               | 138       | 445                | NA        |

|                          |      |                             |                                                    |                                                    |     |      |     |     |     |     |     |
|--------------------------|------|-----------------------------|----------------------------------------------------|----------------------------------------------------|-----|------|-----|-----|-----|-----|-----|
|                          |      |                             | lipid in podocytes                                 |                                                    |     |      |     |     |     |     |     |
| MC                       | 7.8  | GS                          | lipid in mesangium                                 | NO                                                 | 5.7 | 3.3  | 1   | 145 | NA  | NA  |     |
| FS                       | 7.3  | MPGN                        | lipid in mesangium and dense deposits in mesangium | NO                                                 | 5.6 | 2.5  | 3   | 140 | NA  | NA  |     |
| MI                       | 11.7 | FSGS                        | lipid in mesangium                                 | NO                                                 | 4.5 | 3.3  | 1   | 182 | 278 | NA  |     |
| MC                       | 6.6  | GS                          | lipid in capillary walls                           | NO                                                 | 4.3 | 3.1  | 1.9 | NA  | 386 | NA  |     |
| MI                       | 0.5  | FSGS, GCA                   | lipid in mesangium                                 | NO                                                 | 2.9 | 3    | 2.7 | 200 | NA  | NA  |     |
| MC                       | 5.6  | FSGS                        | lipid in capillary wall and mesangium              | NO                                                 | 0.7 | 3.4  | 2.2 | 180 | NA  | NA  |     |
| FS                       | 8.1  | FSGS, arteriolar hyalinosis | GBM opathy and lipid in mesangium                  | NO                                                 | NA  | NA   | NA  | NA  | NA  | NA  |     |
| <b>No Lipid Deposits</b> | MC   | 7.0                         | MGN (but subendo deposits)                         | small subendo deposits                             | YES | 18.5 | 3.9 | 1.6 | 156 | NA  | NA  |
|                          | MC   | 2.9                         | MGN                                                | subepi deposits                                    | YES | 15.6 | 1.3 | 0.8 | 164 | 383 | 115 |
|                          | MC   | 7.0                         | mesangioprolif GN                                  | deposits in the mesangium and subendothelial zones | YES | 10.9 | 2   | 1.2 | 158 | NA  | NA  |
|                          | MC   | 6.6                         | GS                                                 | thick GBM, GBM wrinkling                           | NO  | 7.8  | 2.9 | 1.2 | 160 | NA  | NA  |
|                          | FS   | 5.4                         | MGN                                                | subepi and subendo deposits                        | YES | 4.5  | 2.5 | 0.8 | 100 | NA  | NA  |
|                          | FS   | 8.9                         | ICGN                                               | subepi deposits                                    | YES | 1.9  | 3   | 0.6 | NA  | NA  | NA  |
|                          | FI   | 0.8                         | GCA, fetal glomeruli                               | wrinkled GBM                                       | NO  | 1.8  | NA  | 1.1 | 150 | NA  | NA  |

FS = female spayed

FI = female intact

MC = male castrated

MI = male intact

FSGS = focal segmental glomerulosclerosis

GBM opathy = Abnormal glomerular basement membranes

GCA = Glomerulocystic atrophy

MPGN = membranoproliferative glomerulonephritis

MGN = membranous glomerulonephropathy

ICGN = immune complex glomerulonephropathy

GBM = glomerular basement membrane

UPC = urine protein-to-creatinine ratio

SBP = systolic blood pressure

TG = fasting serum triglyceride concentration

NA = not available (either not performed or not reported)
